# Supplementary material
Source: MDPI journal article supplement (https://www.mdpi.com/2077-0472/13/1/143)
Supplement: s1 [file s1]

|                |                                                               |     |
|----------------|---------------------------------------------------------------|-----|
| XM_005682367.3 | GGAAACCGCAACCGGTTAGCAGACCAGAGAGTGACCCGGATGATGGCGGCCGGCGCGGCCT | 60  |
| H              | GGAAACCGCAACCGGTTAGCAGACCAGAGAGTGACCCGGATGATGGCGGCCGGCGCGGCCT | 60  |
| D              | GGAAACCGCAACCGGTTAGCAGACCAGAGAGTGACCCGGATGATGGCGGCCGGCGCGGCCT | 60  |
|                | *****                                                         |     |
| XM_005682367.3 | TAGGCTTGGCCCTTTGGCTACTACTGCCGCCAGTGGGCGTGGGAGGGGCAGGGCCCCCGC  | 120 |
| H              | TAGGCTTGGCCCTGTGGCTACTACTGCCGCCAGTGGGCGTGGGAGGGGCAGGGCCCCCGC  | 120 |
| D              | TAGGCTTGGCCCTTTGGCTACTACTGCCGCCAGTGGGCGTGGGAGGGGCAGGGCCCCCGC  | 120 |
|                | *****                                                         |     |
| XM_005682367.3 | CGATCCAGGACGGCGAGTTCACGTTCCCTGCTCCCTGCGGGGCGGAAGCAGTGTTCATC   | 180 |
| H              | CGATCCAGGACGGCGAGTTCACGTTCCCTGCTCCCTGCGGGGCGGAAGCAGTGTTCATC   | 180 |
| D              | CGATCCAGGACGGCGAGTTCACGTTCCCTGCTCCCTGCGGGGCGGAAGCAGTGTTCATC   | 180 |
|                | *****                                                         |     |
| XM_005682367.3 | AGTCCGCGCCGGCCAAACGCAAGCCTTGAGACTGAGTACCAGGTGATCGGAGGTGCTGGGC | 240 |
| H              | AGTCCGCGCCGGCCAAACGCAAGCCTTGAGACTGAGTACCAGGTGATCGGAGGTGCTGGGC | 240 |
| D              | AGTCCGCGCCGGCCAAACGCAAGCCTTGAGACTGAGTACCAGGTGATCGGAGGTGCTGGGC | 240 |
|                | *****                                                         |     |
| XM_005682367.3 | TGGACGTGGATTTTCAGTCTGGAGAGCCCTCAGGGAGTGCTGCTGGTCAGCGAGTCCCGCA | 300 |
| H              | TGGACGTGGATTTTCAGTCTGGAGAGCCCTCAGGGAGTGCTGCTGGTCAGCGAGTCCCGCA | 300 |
| D              | TGGACGTGGATTTTCAGTCTGGAGAGCCCTCAGGGAGTGCTGCTGGTCAGCGAGTCCCGCA | 300 |
|                | *****                                                         |     |
| XM_005682367.3 | AGGCAGACGGTGTGCACACGGTGGAGCCACGGAGGCCGGGGACTACAAGCTGTGCTTTG   | 360 |
| H              | AGGCAGACGGTGTGCACACGGTGGAGCCACGGAGGCCGGGGACTACAAGCTGTGCTTTG   | 360 |
| D              | AGGCAGACGGTGTGCACACGGTGGAGCCACGGAGGCCGGGGACTACAAGCTGTGCTTTG   | 360 |
|                | *****                                                         |     |
| XM_005682367.3 | ACAACTCCTTCAGCACCATCTCGGAGAAGCTTGTTCTTTGAACTCATCTTTGACAGCC    | 420 |
| H              | ACAACTCCTTCAGCACCATCTCGGAGAAGCTTGTTCTTTGAACTCATCTTTGACAGCC    | 420 |
| D              | ACAACTCCTTCAGCACCATCTCGGAGAAGCTTGTTCTTTGAACTCATCTTTGACAGCC    | 420 |
|                | *****                                                         |     |
| XM_005682367.3 | TACAGGATGAGGAGGAGGTCGAGGGCTGGGCAGAGGCTGTGGAGCCTGAGGAGAT       | 475 |
| H              | TACAGGATGAGGAGGAGGTCGAGGGCTGGGCAGAGGCTGTGGAGCCTGAGGAGAT       | 475 |
| D              | TACAGGATGAGGAGGAGGTCGAGGGCTGGGCAGAGGCTGTGGAGCCTGAGGAGAT       | 475 |
|                | *****                                                         |     |

**Figure S1.** *TMED1* gene (475-bp) demonstrative DNA sequence alignment between healthy and diarrheal Baladi kids, together with the reference sequence found in GenBank (gb|XM 005682367.3).

|                |                                                              |     |
|----------------|--------------------------------------------------------------|-----|
| XM_005682299.3 | TGCAGAGCTGCTGCCGGACGAGTGACTTAAAGGGCCCCGCGGCCACCGCCCCCTCGGCC  | 60  |
| H              | TGCAGAGCTGCTGCCGGACGAGTGACTTAAAGGGCCCCGCGGCCACCGCCCCCTCGGCC  | 60  |
| D              | TGCAGAGCTGCTGCCGGACGAGTGACTTAAAGGGCCCCGCGGCCACCGCCCCCTCGGCC  | 60  |
|                | *****                                                        |     |
| XM_005682299.3 | GCCATGCTGCTACCCGTGCCGCTGCTGCTCGGCCCTTCTCGGCCTGGCCGCGCTGATCCC | 120 |
| H              | GCCATGCTGCTACCCGTGCCGCTGCTGCTCGGCCCTTCTCGGCCTGGCCGCGCTGATCCC | 120 |
| D              | GCCATGCTGCTACCCGTGCCGCTGCTGCTCGGCCCTTCTCGGCCTGGCCGCGCTGATCCC | 120 |
|                | *****                                                        |     |
| XM_005682299.3 | ACCGTTTACTTCAAGGAGCAGTTTCTGGACGGAGACGGGTGGACCGAGCGCTGGATCGAA | 180 |
| H              | ACCGTTTACTTCAAGGAGCAGTTTCTGGACGGAGACGGGTGGACCGAGCGCTGGATCGAA | 180 |
| D              | ACCGTTTACTTCAAGGAGCAGTTTCTAGACGGAGACGGGTGGACCGAGCGCTGGATCGAA | 180 |
|                | *****                                                        |     |
| XM_005682299.3 | TCCAAACACAAACCGGATTTTGGCAAATTCGTTCTCAGTTCGGCAAGTTCTATGGTGAC  | 240 |
| H              | TCCAAACACAAACCGGATTTTGGCAAATTCGTTCTCAGTTCGGCAAGTTCTATGGTGAC  | 240 |
| D              | TCCAAACACAAACCGGATTTTGGCAAATTCGTTCTCAGTTCGGCAAGTTCTATGGTGAC  | 240 |
|                | *****                                                        |     |
| XM_005682299.3 | CAGGAGAAAGATAAAGGCCTGCAGACTAGCCAGGATGCCCGTTTCTACGCTCTGTCCGCG | 300 |
| H              | CAGGAGAAAGATAAAGGCCTGCAGACTAGCCAGGATGCCCGTTTCTACGCTCTGTCCGCG | 300 |
| D              | CAGGAGAAAGATAAAGGCCTGCAGACTAGCCAGGATGCCCGTTTCTACGCTCTGTCCGCG | 300 |
|                | *****                                                        |     |
| XM_005682299.3 | AGATTTGAGCCCTTCAGCAACAAGGGTCAGACGCTGGTGGTGCAGTTCACGGTGAAACAC | 360 |
| H              | AGATTTGAGCCCTTCAGCAACAAGGGTCAGACGCTGGTGGTGCAGTTCACGGTGAAACAC | 360 |
| D              | AGATTTGAGCCCTTCAGCAACAAGGGTCAGACGCTGGTGGTGCAGTTCACGGTGAAACAC | 360 |
|                | *****                                                        |     |
| XM_005682299.3 | GAGCAGAACATCGACTGTGGGGGCGGCTATGTGAAGCTGTTTCCAGCTGGTTGGATCAG  | 420 |
| H              | GAGCAGAACATCGACTGTGGGGGCGGCTATGTGAAGCTGTTTCCAGCTGGTTGGATCAG  | 420 |
| D              | GAGCAGAACATCGACTGTGGGGGCGGCTATGTGAAGCTGTTTCCAGCTGGTTGGATCAG  | 420 |
|                | *****                                                        |     |
| XM_005682299.3 | ACAGACATGCACGGGGACTCCGAATACAACATCATGTTTGGCCCGGACATCTGTGGACCT | 480 |
| H              | ACAGACATGCACGGGGACTCCGAATACAACATCATGTTTGGCCCGGACATCTGTGGACCT | 480 |
| D              | ACAGACATGCACGGGGACTCCGAATACAACATCATGTTTGGCCCGGACATCTGTGGACCT | 480 |
|                | *****                                                        |     |
| XM_005682299.3 | GGCACCAAGAAGGTTTCATGTCATCTTCAACTACAAGG 517                   |     |
| H              | GGCACCAAGAAGGTTTCATGTCATCTTCAACTACAAGG 517                   |     |
| D              | GGCACCAAGAAGGTTTCATGTCATCTTCAACTACAAGG 517                   |     |
|                | *****                                                        |     |

**Figure S2.** *CALR* gene (517-bp) demonstrative DNA sequence alignment between healthy and diarrheal Baladi kids, together with the reference sequence found in GenBank gb|XM\_005682299.3|.

|                |                                                               |     |
|----------------|---------------------------------------------------------------|-----|
| XM_018051277.1 | TCTGAGGCTGACAGGGCAGGGCCAGCCGCGCCCCACCCGTGCGCATGGAGCTACCTCCAGG | 60  |
| H              | TCTGAGGCTGACAGGGCAGGGCCAGCCGCGCCCCACCCGTGCGCATGGAGCTACCTCCAGG | 60  |
| D              | TCTGAGGCTGACAGGGCAGGGCCAGCCGCGCCCCACCCGTGCGCATGGAGCTACCTCCAGG | 60  |
|                | *****                                                         |     |
| XM_018051277.1 | GCCGCGCGACGATCCCCACACCTGGGACGATGACTCGGACCCGGAGCTGGAGCCTGACCC  | 120 |
| H              | GCCGCGCGACGATCCCCACACCTGGGACGATGACTCGGACCCGGAGCTGGAGCCTGACCC  | 120 |
| D              | GCCGCGCGACGATCCCCACACCTGGGACGATGACTCGGACCCGGAGCTGGAGCCTGACCC  | 120 |
|                | *****                                                         |     |
| XM_018051277.1 | CGACGCGCAGGCCGAGGCTTACGTGGCCCGTGTGCTCAGTCCTCCGAAACTCGGGCTGGC  | 180 |
| H              | CGACGCGCAGGCCGAGGCTTACGTGGCCCGTGTGCTCAGTCCTCCGAAACTCGGGCTGGC  | 180 |
| D              | CGACGCGCAGGCCGAGGCTTACGTGGCCCGTGTGCTCAGTCCTCCGAAACTCGGGCTGGC  | 180 |
|                | *****                                                         |     |
| XM_018051277.1 | ACCTCCACGCGCCCTCCTTTGCCCGCGCCTACGGTGTCCCTTGGCGCTCTGGAACCGCG   | 240 |
| H              | ACCTCCACGAGCCCTCCTTTGCCCGCGCCTACGGTGTCCCTTGGCGCTCTGGAACCGCG   | 240 |
| D              | ACCTCCACGCGCCCTCCTTTGCCCGCGCCTACGGTGTCCCTTGGCGCTCTGGAACCGCG   | 240 |
|                | *****                                                         |     |
| XM_018051277.1 | GGCCGCGTCCAAGGGCTCGACTGTGGCGGTTCCGGGCCTGCTAAGCCTACCCCGGAGCT   | 300 |
| H              | GGCCGCGTCCAAGGGCTCGACTGTGGCGGTTCCGGGCCTGCTAAGCCTACCCCGGAGCT   | 300 |
| D              | GGCCGCGTCCAAGGGCTCGACTGTGGCGGTTCCGGGCCTGCTAAGCCTACCCCGGAGCT   | 300 |
|                | *****                                                         |     |
| XM_018051277.1 | GCTTCTCGAGATCTGCGCCTACCTCGACG                                 | 329 |
| H              | GCTTCTCGAGATCTGCGCCTACCTCGACG                                 | 329 |
| D              | GCTTCTCGAGATCTGCGCCTACCTCGACG                                 | 329 |
|                | *****                                                         |     |

**Figure S3.** *FBXW9* gene (329-bp) demonstrative DNA sequence alignment between healthy and diarrheal Baladi kids, together with the reference sequence found in GenBank gb|XM\_018051277.1|.

|                |                                                               |     |
|----------------|---------------------------------------------------------------|-----|
| XM_018056433.1 | GGTTCGTGCCGCGCTTCAACTTCACCCCGAAGGACCTGACCCGCTTCGTGGATTTCAACA  | 60  |
| H              | GGTTCGTGCCGCGCTTCAACTTCACCCCGAAGGACCTGACCCGCTTCGTGGATTTCAACA  | 60  |
| D              | GGTTCGTGCCGCGCTTCAACTTCACCCCGAAGGACCTGACCCGCTTCGTGGATTTCAACA  | 60  |
|                | *****                                                         |     |
| XM_018056433.1 | TCAAGGGGCGCGACGTGATTGTCTTCCTGCACATCCAGAAGACCGGGGGCACCACGTTTCG | 120 |
| H              | TCAAGGGGCGCGACGTGATTGTCTTCCTGCACATCCAGAAGACCGGGGGCACCACGTTTCG | 120 |
| D              | TCAAGGGGCGCGACGTGATTGTCTTCCTGCACATCCAGAAGACCGGGGGCACCACGTTTCG | 120 |
|                | *****                                                         |     |
| XM_018056433.1 | GCCGGCACCTGGTGAAGAACATCCGGCTGGAGCAGCCGTGCAGCTGCAAAGCCGGCCAGA  | 180 |
| H              | GCCGGCACCTGGTGAAGAACATCCGGCTGGAGCAGCCGTGCAGCTGCAAAGCCGGCCAGA  | 180 |
| D              | GCCGGCACCTGGTGAAGAACATCCGGCTGGAGCAGCCGTGCAGCTGCAAAGCCGGCCAGA  | 180 |
|                | *****                                                         |     |
| XM_018056433.1 | AGAAGTGCACCTGCCACCGCCCGGCAAGAAAGAGACGTGGCTCTTCTCCCGCTTCTCCA   | 240 |
| H              | AGAAGTGCACCTGCCACCGCCCGGCAAGAAAGAGACGTGGCTCTTCTCCCGCTTCTCCA   | 240 |
| D              | AGAAGTGCACCTGCCACCGCCCGGCAAGAAAGAGACGTGGCTCTTCTCCCGCTTCTCCA   | 240 |
|                | *****                                                         |     |
| XM_018056433.1 | CCGGCTGGAGCTGCGGGCTGCACGCCGACTGGACGGAGCTCACCAACTGTGTGCCGGCCA  | 300 |
| H              | CCGGCTGGAGCTGCGGGCTGCACGCCGACTGGACGGAGCTCACCAACTGTGTGCCGGCCA  | 300 |
| D              | CCGGCTGGAGCTGCGGGCTGCACGCCGACTGGACGGAGCTCACCAACTGTGTGCCGGCCA  | 300 |
|                | *****                                                         |     |
| XM_018056433.1 | TCATGGAGAAGAAAGACTGTCCCCGCAACCACAGCCACACCAGGAATTTCTATTACATCA  | 360 |
| H              | TCATGGAGAAGAAAGACTGTCCCCGCAACCACAGCCACACCAGGAATTTCTATTACATCA  | 360 |
| D              | TCATGGAGAAGAAAGACTGTCCCCGCAACCACAGCCACACCAGGAATTTCTATTACATCA  | 360 |
|                | *****                                                         |     |
| XM_018056433.1 | CCATGTTGCGGGATCCAGTGTCCCGATACCTGAGCGAGTGGAACACGTCCAGAGAGGGG   | 420 |
| H              | CCATGTTGCGGGATCCAGTGTCCCGATACCTGAGCGAGTGGAACACGTCCAGAGAGGGG   | 420 |
| D              | CCATGTTGCGGGATCCAGTGTCCCGATACCTGAGCGAGTGGAACACGTCCAGAGAGGGG   | 420 |
|                | *****                                                         |     |
| XM_018056433.1 | CCACGTGGAAAACCTCCCTCCACATGTGCGACGGGAGGAGCCCCACCCAGACGAGCTGC   | 480 |
| H              | CCACGTGGAAAACCTCCCTCCACATGTGCGACGGGAGGAGCCCCACCCAGACGAGCTGC   | 480 |
| D              | CCACGTGGAAAACCTCCCTCCACATGTGCGACGGGAGGAGCCCCACCCAGACGAGCTGC   | 480 |
|                | *****                                                         |     |
| XM_018056433.1 | CTACCTGCTACCCAGGGGATGACTGGTCT                                 | 509 |
| H              | CTACCTGCTACCCAGGGGATGACTGGTCT                                 | 509 |
| D              | CTACCTGCTACCCAGGGGATGACTGGTCT                                 | 509 |
|                | *****                                                         |     |

**Figure S4.** *HS6ST3* gene (509-bp) demonstrative DNA sequence alignment between healthy and diarrheal Baladi kids, Table 018056433. 11.

|                |                                                               |     |
|----------------|---------------------------------------------------------------|-----|
| XM_018040226.1 | TCGTTGGCGGGAGATGTCGAACCCCGGGACGCGGAGGAACGGCTCCAGCATCAAGATCCG  | 60  |
| H              | TCGTTGGCGGGAGATGTCGAACCCCGGGACGCGGAGGAACGGCTCCAGCATCAAGATCCG  | 60  |
| D              | TCGTTGGCGGGAGATGTCGAACCCCGGGACGCGGAGGAACGGCTCCAGCATCAAGATCCG  | 60  |
|                | *****                                                         |     |
| XM_018040226.1 | TCTGACAGTATTATGTGCCAAGAACCCTTGCAAAGAAAGACTTCTTCAGGCTCCCTGACCC | 120 |
| H              | TCTGACAGTATTATGTGCCAAGAACCCTTGCAAAGAAAGACTTCTTCAGGCTCCCTGACCC | 120 |
| D              | TCTGACAGTATTATGTGCCAAGAACCCTTGCAAAGAAAGACTTCTTCAGGCTCCCTGACCC | 120 |
|                | *****                                                         |     |
| XM_018040226.1 | TTTGTCAAAGATTGTTGTGGACGGATCTGGGCAGTGCCACTCAACGGACACTGTGAAGAG  | 180 |
| H              | TTTGTCAAAGATTGTTGTGGACGGATCTGGGCAGTGCCACTCAACGGACACTGTGAAGAG  | 180 |
| D              | TTTGTCAAAGATTGTTGTGGACGGATCTGGGCAGTGCCACTCAACGGACACTGTGAAGAG  | 180 |
|                | *****                                                         |     |
| XM_018040226.1 | CACATTGGACCCAAAGTGGAAACCAGCACTACGATCTATATGTTGAAAAACGGATTCTAT  | 240 |
| H              | CACATTGGACCCAAAGTGGAAACCAGCACTACGATCTATATGTTGAAAAACGGATTCTAT  | 240 |
| D              | CACATTGGACCCAAAGTGGAAACCAGCACTACGATCTATATGTTGAAAAACGGATTCTAT  | 240 |
|                | *****                                                         |     |
| XM_018040226.1 | AACCATCAGCGTGTGGAACCACAAGAAGGTTACAAGAAGCAGGGAGCCGGCTTCCTGGG   | 300 |
| H              | AACCATCAGCGTGTGGAACCACAAGAAGGTTACAAGAAGCAGGGAGCCGGCTTCCTGGG   | 300 |
| D              | AACCATCAGCGTGTGGAACCACAAGAAGGTTACAAGAAGCAGGGAGCCGGCTTCCTGGG   | 300 |
|                | *****                                                         |     |
| XM_018040226.1 | GTGTGTGCGGCTGCTCTCCAATGCCGTGAGCAGGTTAAAAGACACTGGCTACCAGCGTTT  | 360 |
| H              | GTGTGTGCGGCTGCTCTCCAATGCCGTGAGCAGGTTAAAAGACACTGGCTACCAGCGTTT  | 360 |
| D              | GTGTGTGCGGCTGCTCTCCAATGCCGTGAGCAGGTTAAAAGACACTGGCTACCAGCGTTT  | 360 |
|                | *****                                                         |     |
| XM_018040226.1 | GGATCTGTGCAAACTAAACCCCTCAGATACTGATGCAGTTTCGTGGCCAAATAGTGGTCAG | 420 |
| H              | GGATCTGTGCAAACTAAACCCCTCAGATACTGATGCAGTTTCGTGGCCAAATAGTGGTCAG | 420 |
| D              | GGATCTGTGCAAACTAAACCCCTCAGATACTGATGCAGTTTCGTGGCCAAATAGTGGTCAG | 420 |
|                | *****                                                         |     |
| XM_018040226.1 | TCTACAGACACGAGACAGGCCCGGCACCGCGGCTCTGTGGTGGACTGCAGGGGCCTGCT   | 480 |
| H              | TCTACAGACACGAGACAGGCCCGGCACCGCGGCTCTGTGGTGGACTGCAGGGGCCTGCT   | 480 |
| D              | TCTACAGACACGAGACAGGCCCGGCACCGCGGCTCTGTGGTGGACTGCAGGGGCCTGCT   | 480 |
|                | *****                                                         |     |
| XM_018040226.1 | GGAGAGCGACGGAACCGTGTATGAAGACTCCGGGCCTGGAAGGCCCTCAGCTGCTTCAT   | 540 |
| H              | GGAGAGCGACGGAACCGTGTATGAAGACTCCGGGCCTGGAAGGCCCTCAGCTGCTTCAT   | 540 |
| D              | GGAGAGCGACGGAACCGTGTATGAAGACTCCGGGCCTGGAAGGCCCTCAGCTGCTTCAT   | 540 |
|                | *****                                                         |     |
| XM_018040226.1 | GGAGGAGCCAGC                                                  | 552 |
| H              | GGAGGAGCCAGC                                                  | 552 |
| D              | GGAGGAGCCAGC                                                  | 552 |
|                | *****                                                         |     |

**Figure S5.** *SMURF1* gene (552-bp) demonstrative DNA sequence alignment between healthy and diarrheal Baladi kids, together with the reference sequence found in GenBank gb|XM\_018040226.1|.

|                |                                                                |     |
|----------------|----------------------------------------------------------------|-----|
| XM_005697882.3 | TGAGCAGGCCTTGAAGAGGAGGAACATCACCGATGTCTCACTTGACCCCTTCTGATCAGCA  | 60  |
| H              | TGAGCAGGCCTTGAAGAGGAGGAACATCACCGATGTCTCACTTGACCCCTTCTGATCAGCA  | 60  |
| D              | TGAGCAGGCCTTGAAGAGGAGGAACATCACCGATGTCTCACTTGACCCCTTCTGATCAGCA  | 60  |
|                | *****                                                          |     |
| XM_005697882.3 | GACCAAAGGGGTGAGCCTCACCATGCAAGAAATAATCAGTGGTGTCAATGCCTCAGATCC   | 120 |
| H              | GACCAAAGGGGTGAGCCTCACCTTGCAAGAAATAATCAGTGGTGTCAATGCCTCAGATCC   | 120 |
| D              | GACCAAAGGGGTGAGCCTCACCATGCAAGAAATAATCAGTGGTGTCAATGCCTCAGATCC   | 120 |
|                | *****                                                          |     |
| XM_005697882.3 | AGAACTATGTTTCCAGGCCACCCAGCAGCCAGGAAATGCTGTCCCGGGAGAAGAACC      | 180 |
| H              | AGAACTATGTTTCCAGGCCACCCAGCAGCCAGGAAATGCTGTCCCGGGAGAAGAACC      | 180 |
| D              | AGAACTATGTTTCCAGGCCACCCAGCAGCCAGGAAATGCTGTCCCGGGAGAAGAACC      | 180 |
|                | *****                                                          |     |
| XM_005697882.3 | TCCTCTGAAGCTGATTGTGGACGCGGGACTCATCCCCAGGCTGGTGGAGCTCCTGAAGTC   | 240 |
| H              | TCCTCTGAAGCTGATTGTGGATGCGGGACTCATCCCCAGGCTGGTGGAGCTCCTGAAGTC   | 240 |
| D              | TCCTCTGAAGCTGATTGTGGACGCGGGACTCATCCCCAGGCTGGTGGAGCTCCTGAAGTC   | 240 |
|                | *****                                                          |     |
| XM_005697882.3 | GTCTTTTACCCCCCGCTTGCAGTTCGAGGCAGCCTGGGCTCTGACCAACATTGCTTCAGG   | 300 |
| H              | GTCTTTTACCCCCCGCTTGCAGTTCGAGGCAGCCTGGGCTCTGACCAACATTGCTTCAGG   | 300 |
| D              | GTCTTTTACCCCCCGCTTGCAGTTCGAGGCAGCCTGGGCTCTGACCAACATTGCTTCAGG   | 300 |
|                | *****                                                          |     |
| XM_005697882.3 | GGCCTCGGAGCTGACTCGCGCCGTCGTGGACGGGGGTGCCATCCAGCCCCTGGTTGAGCT   | 360 |
| H              | GGCCTCGGAGCTGACTCGCGCCGTCGTGGACGGGGGTGCCATCCAGCCCCTGGTTGAGCT   | 360 |
| D              | GGCCTCAGAGCTGACTCGCGCCGTCGTGGACGGGGGTGCCATCCAGCCCCTGGTTGAGCT   | 360 |
|                | *****                                                          |     |
| XM_005697882.3 | CCTGTCTTCCCTCACATGACTGTGTGTGAACAGGCCGTGTGGGCCCTCGGGAACATAGC    | 420 |
| H              | CCTGTCTTCCCTCACATGACTGTGTGTGAACAGGCCGTGTGGGCCCTCGGGAACATAGC    | 420 |
| D              | CCTGTCTTCCCTCACATGACTGTGTGTGAACAGGCCGTGTGGGCCCTCGGGAACATAGC    | 420 |
|                | *****                                                          |     |
| XM_005697882.3 | AGGTGATGGACCAGAATTGAGAGACAATGTTATCGCAAGTGATGCCATTCCACATCTGCT   | 480 |
| H              | AGGTGATGGACCAGAATTGAGAGACAATGTTATCGCGAGTGATGCCATTCCACATCTGCT   | 480 |
| D              | AGGTGATGGACCAGAATTGAGAGACAATGTTATCGCAAGTGATGCCATTCCACATCTGCT   | 480 |
|                | *****                                                          |     |
| XM_005697882.3 | GACCCCTGGTTTCGTCAAACATAACAGTCCCGTTTCTGCGCAACATCGCCTGGACCCCTGTC | 540 |
| H              | GACCCCTGGTTTCGTCAAACATAACAGTCCCGTTTCTGCGCAACATCGCCTGGACCCCTGTC | 540 |
| D              | GACCCCTGGTTTCGTCAAACATAACAGTCCCGTTTCTGCGCAACATCGCCTGGACCCCTGTC | 540 |
|                | *****                                                          |     |
| XM_005697882.3 | CAACCTGTGCCGGAACAAGAACCCTACCCCTCCGACCACGCAGTGAAGCAGATGTTGCC    | 600 |
| H              | CAACCTGTGCCGGAACAAGAACCCTACCCCTCCGACCACGCAGTGAAGCAGATGTTGCC    | 600 |
| D              | CAACCTGTGCCGGAACAAGAACCCTACCCCTCCGACCACGCAGTGAAGCAGATGTTGCC    | 600 |
|                | *****                                                          |     |
| XM_005697882.3 | CGTCCTCTTCTACCTCCT 618                                         |     |
| H              | CGTCCTCTTCTACCTCCT 618                                         |     |
| D              | CGTCCTCTTCTACCTCCT 618                                         |     |
|                | *****                                                          |     |

**Figure S6.** *KPNA7* gene (618-bp) demonstrative DNA sequence alignment between healthy and diarrheal Baladi kids, together with the reference sequence found in GenBank gb|XM\_005697882.3|.

|                |                                                              |     |
|----------------|--------------------------------------------------------------|-----|
| XM_005682343.2 | TACCTCCAGGTCCGGGATCGGATCCGAATCTCCAGGTGCGGCCGCCCTGCGGGAGGGA   | 60  |
| H              | TACCTCCAGGTCCGGGATCGGATCCGAATCTCCAGGTGCGGCCGCCCTGCGGGAGGGA   | 60  |
| D              | TACCTCCAGGTCCGGGATCGGATCCGAATCTCCAGGTGCGGCCGCCCTGCGGGAGGGA   | 60  |
|                | *****                                                        |     |
| XM_005682343.2 | AGGGCCAGGCGGGGGGCGCACTAGGAGACGCACATCTGATCCTCGCGGGGCCGGTCTGT  | 120 |
| H              | AGGGCCAGGCGGGGGGCGCACTAGGAGACGCACATCTGATCCTCGCGGGGCCGGTCTGT  | 120 |
| D              | AGGGCCAGGCGGGGGGCGCACTAGGAGACGCACATCTGATCCTCGCGGGGCCGGTCTGT  | 120 |
|                | *****                                                        |     |
| XM_005682343.2 | TCTAACGGCGGGTCCCTCCCCAGGGTCTGTCAACACTGGAAGAAGCTGGTGGACGACC   | 180 |
| H              | TCTAACGGCGGGTCCCTCCCCAGGGTCTGTCAACACTGGAAGAAGCTGGTGGACGACC   | 180 |
| D              | TCTAACGGCGGGTCCCTCCCCAGGGTCTGTCAACACTGGAAGAAGCTGGTGGACGACC   | 180 |
|                | *****                                                        |     |
| XM_005682343.2 | GGTGGCTGTGGCGACACGTCGACCTGACGCTCTACACGTTGCTATCTACATGGCTGTTAT | 240 |
| H              | GGTGGCTGTGGCGACACGTCGACCTGACGCTCTACACGTTGCTATCTACATGGCTGTTAT | 240 |
| D              | GGTGGCTGTGGCGACACGTCGACCTGACGCTCTACACGTTGCTATCTACATGGCTGTTAT | 240 |
|                | *****                                                        |     |
| XM_005682343.2 | CACTGGACATTTTTTGTCTTTAAACCACGATGTGAGAAACCAACGTTTCTGTAAGATGCG | 300 |
| H              | CACTGGACATTTTTTGTCTTTAAACCACGATGTGAGAAACCAACGTTTCTGTAAGATGCG | 300 |
| D              | CACTGGACATTTTTTGTCTTTAAACCACGATGTGAGAAACCAACATTTCTGTAAGATGCG | 300 |
|                | *****                                                        |     |
| XM_005682343.2 | GCCCAAAGTCATGTGGCACTCCTCCGCCGTACATGGCATCCAGGCTCCATTCCCTGCG   | 360 |
| H              | GCCCAAAGTCATGTGGCACTCCTCCGCCGTACATGGCATCCAGGCTCCATTCCCTGCG   | 360 |
| D              | GCCCAAAGTCATGTGGCACTCCTCCGCCGTACATGGCATCCAGGCTCCATTCCCTGCG   | 360 |
|                | *****                                                        |     |
| XM_005682343.2 | GATGGCGGGCTACCTGTTCTCAGGCTCCCAGGCTCCCCAGCTGTCCCTGCCCTGATGAG  | 420 |
| H              | GATGGCGGGCTACCTGTTCTCAGGCTCCCAGGCTCCCCAGCTGTCCCTGCCCTGATGAG  | 420 |
| D              | GATGGCGGGCTACCTGTTCTCAGGCTCCCAGGCTCCCCAGCTGTCCCTGCCCTGATGAG  | 420 |
|                | *****                                                        |     |
| XM_005682343.2 | GGCCCTGGGTGAGAAAGTGCCCCAACCTCAAGCGCCTCTGCCTGCATGTGGCCAACTGAG | 480 |
| H              | GGCCCTGGGTGAGAAAGTGCCCCAACCTCAAGCGCCTCTGCCTGCATGTGGCCAACTGAG | 480 |
| D              | GGCCCTGGGTGAGAAAGTGCCCCAACCTCAAGCGCCTCTGCCTGCATGTGGCCAACTGAG | 480 |
|                | *****                                                        |     |
| XM_005682343.2 | CATGGTGCCCATCACCAGCCTGCCCTGCACCCTGAGGACCTGGAGCTGCATAGCTGTGA  | 540 |
| H              | CATGGTGCCCATCACCAGCCTGCCCTGCACCCTGAGGACCTGGAGCTGCATAGCTGTGA  | 540 |
| D              | CATGGTGCCCATCACCAGCCTGCCCTGCACCCTGAGGACCTGGAGCTGCATAGCTGTGA  | 540 |
|                | *****                                                        |     |
| XM_005682343.2 | GATCTCCATGGCCTGGCTCCATAAAGAGCAGGACCCACAGTGCTGCCCTGCTCGAGTG   | 600 |
| H              | GATCTCCATGGCCTGGCTCCATAAAGAGCAGGACCCACAGTGCTGCCCTGCTCGAGTG   | 600 |
| D              | GATCTCCATGGCCTGGCTCCATAAAGAGCAGGACCCACGCTGCTGCCCTGCTCGAGTG   | 600 |
|                | *****                                                        |     |
| XM_005682343.2 | CATCGTGCTGGACCGCTCCCCGCCTTCCGCGACGAGCACCTGCAGG               | 647 |
| H              | CATCGTGCTGGACCGCTCCCCGCCTTCCGCGACGAGCACCTGCAGG               | 647 |
| D              | CATCGTGCTGGACCGCTCCCCGCCTTCCGCGACGAGCACCTGCAGG               | 647 |
|                | *****                                                        |     |

**Figure S7.** *FBXL12* gene (647-bp) demonstrative DNA sequence alignment between healthy and diarrheal Baladi kids, together with the reference sequence found in GenBank gb|XM\_005682343.2|.

|                |                                                                |     |
|----------------|----------------------------------------------------------------|-----|
| XM_018051006.1 | GAGGAGAAGCTGCCGCCCGGCTGGGAGAAGCGTATGAGCCGCAGCTCAGGCCGGGTGTAC   | 60  |
| H              | GAGGAGAAGCTGCCGCCCGGCTGGGAGAAGCGTATGAGCCGCAGCTCAGGCCGGGTGTAC   | 60  |
| D              | GAGGAGAAGCTGCCGCCCGGCTGGGAGAAGCGTATGAGCCGCAGCTCAGGCCGGGTGTAC   | 60  |
|                | *****                                                          |     |
| XM_018051006.1 | TACTTCAATCACATCACTAATGCCAGCCAGTGGGAGCGGCCAAGTGGCAACAGCAGTGGC   | 120 |
| H              | TACTTCAATCACATCACTAATGCCAGCCAGTGGGAGCGGCCAAGTGGCAACAGCAGTGGC   | 120 |
| D              | TACTTCAATCACATCACTAATGCCAGCCAGTGGGAGCGGCCAAGTGGCAACAGCAGTGGC   | 120 |
|                | *****                                                          |     |
| XM_018051006.1 | AGCGGCCAAAAATGGACAAGGGGAGCCCAACCAGGGTCCGCTGCTCACACCTGCTGGTCAAG | 180 |
| H              | AGCGGCCAAAAATGGACAAGGGGAGCCCAACCAGGGTCCGCTGCTCACACCTGCTGGTCAAG | 180 |
| D              | AGCGGCCAAAAACGGACAAGGGGAGCCCAACCAGGGTCCGCTGCTCACACCTGCTGGTCAAG | 180 |
|                | *****                                                          |     |
| XM_018051006.1 | CACAGCCAGTCACGGCGACCCCTCATCCTGGCGGCAGGAGAAGATCACCCGAACCAAGGAG  | 240 |
| H              | CACAGCCAGTCACGGCGACCCCTCATCCTGGCGGCAGGAGAAGATCACCCGAACCAAGGAG  | 240 |
| D              | CACAGCCAGTCACGGCGGCCCTCATCCTGGCGGCAGGAGAAGATCACCCGAACCAAGGAA   | 240 |
|                | *****                                                          |     |
| XM_018051006.1 | GAGGCCCTGGAGCTGATCAATGGCTACATCCAGAAGATTAAAGTCTGGAGAGGAGGACTTT  | 300 |
| H              | GAGGCCCTGGAGCTGATCAATGGCTACATCCAGAAGATTAAAGTCTGGAGAGGAGGACTTT  | 300 |
| D              | GAGGCCCTGGAGCTGATCAATGGCTACATCCAGAAGATTAAAGTCTGGAGAGGAGGACTTT  | 300 |
|                | *****                                                          |     |
| XM_018051006.1 | GAATCTCTGGCCTCACAGTTCAGCGACTGCAGCTCCGCCAAGGCCAGGGGAGACCTGGGT   | 360 |
| H              | GAATCTCTGGCCTCACAGTTCAGCGACTGCAGCTCCGCCAAGGCCAGGGGAGACCTGGGT   | 360 |
| D              | GAATCTCTGGCCTCACAGTTCAGCGACTGCAGCTCCGCCAAGGCCAGGGGAGACCTGGGT   | 360 |
|                | *****                                                          |     |
| XM_018051006.1 | GCCTTCAGCAGAGGTGAGATGCAGAAGCCATTTGAAGACGCCTCCTTCGCGCTGCGGACA   | 420 |
| H              | GCCTTCAGCAGAGGTGAGATGCAGAAGCCATTTGAAGACGCCTCCTTCGCGCTGCGGACA   | 420 |
| D              | GCCTTCAGCAGAGGTGAGATGCAGAAGCCATTTGAAGACGCCTCCTTCGCGCTGCGGACA   | 420 |
|                | *****                                                          |     |
| XM_018051006.1 | GGGGAGATGAGCGGGCCCGTGTTCACAGATTGCGGCATCCACATCATCCTTCGCACGGAG   | 480 |
| H              | GGGGAGATGAGCGGGCCCGTGTTCACAGATTGCGGCATCCACATCATCCTTCGCACGGAG   | 480 |
| D              | GGGGAGATGAGCGGGCCCGTGTTCACAGATTGCGGCATCCACATCATCCTTCGCACGGAG   | 480 |
|                | *****                                                          |     |
| XM_018051006.1 | TGAGGGGTGTGGATGGCCAGGCCTGGCCCCCTGGGGGAGACGGGTGGGACGGGTGGCT     | 540 |
| H              | TGAGGGGTGTGGATGGCCAGGCCTGGCCCCCTGGGGGAGACGGGTGGGACGGGTGGCT     | 540 |
| D              | TGAGGGGTGTGGATGGCCAGGCCTGGCCCCCTGGGGGAGACGGGTGGGACGGGTGGCT     | 540 |
|                | *****                                                          |     |
| XM_018051006.1 | GGGCCCACAGACTCCGCTCCCTGCTGCCGGCCAACCAGTGGGGACCCCTCCCTTCTCCTG   | 600 |
| H              | GGGCCCACAGACTCCGCTCCCTGCTGCCGGCCAACCAGTGGGGACCCCTCCCTTCTCCTG   | 600 |
| D              | GGGCCCACAGACTCCGCTCCCTGCTGCCGGCCAACCAGTGGGGACCCCTCCCTTCTCCTG   | 600 |
|                | *****                                                          |     |
| XM_018051006.1 | TCACACAGTAT                                                    | 611 |
| H              | TCACACAGTAT                                                    | 611 |
| D              | TCACACAGTAT                                                    | 611 |
|                | *****                                                          |     |

**Figure S8.** *PIN1* gene (611-bp) demonstrative DNA sequence alignment between healthy and diarrheal Baladi kids, together with the reference sequence found in GenBank gb|XM\_018051006.1|.



|                |                                                               |     |
|----------------|---------------------------------------------------------------|-----|
| XM_018051062.1 | TGAGCGAGGTCATCGTCCAGCATTACAACCTACACCGGCAAGCTCCGCGGTGCGCGCTACC | 60  |
| H              | TGAGCGAGGTCATCGTCCAGCATTACAACCTACACCGGCAAGCTCCGCGGTGCGCGCTACC | 60  |
| D              | TGAGCGAGGTCATCGTCCAGCATTACAACCTACACCGGCAAGCTCCGCGGTGCGCGCTACC | 60  |
|                | *****                                                         |     |
| XM_018051062.1 | AGCCTGGCGCGGGACTGCGTGCAGATGCCGTGCTGCTGGCCGTGTGCGCGCTCATCG     | 120 |
| H              | AGCCTGGCGCGGGACTGCGTGCAGATGCCGTGCTGCTGGCCGTGTGCGCGCTCATCG     | 120 |
| D              | AGCCTGGCGCGGGACTGCGTGCAGATGCCGTGCTGCTGGCCGTGTGCGCGCTCATCG     | 120 |
|                | *****                                                         |     |
| XM_018051062.1 | TGTTGGAGAACTTAGCCGTGCTGATCGTGCTCGGACGCCACCCGCGCTTCCATGCGCCCA  | 180 |
| H              | TGTTGGAGAACTTAGCCGTGCTGATCGTGCTCGGACGCCACCCGCGCTTCCATGCGCCCA  | 180 |
| D              | TGTTGGAGAACTTAGCCGTGCTGATCGTGCTCGGACGCCACCCGCGCTTCCATGCGCCCA  | 180 |
|                | *****                                                         |     |
| XM_018051062.1 | TGTTCTGCTTCTGGGCAGCCTCACGCTGTCCGACCTGCTGGCCGGCGCCGCTATGCCG    | 240 |
| H              | TGTTCTGCTTCTGGGCAGCCTCACGCTGTCCGACCTGCTGGCCGGCGCCGCTATGCCG    | 240 |
| D              | TGTTCTGCTTCTGGGAAGCCTCACGCTGTCCGACCTGCTGGCCGGCGCCGCTATGCCG    | 240 |
|                | *****                                                         |     |
| XM_018051062.1 | CCAACATCCTGCTGTCCGGGCGCTCACGCTACGCTCTGTGCCCCGCGCTCTGGTTGCCC   | 300 |
| H              | CCAACATCCTGCTGTCCGGGCGCTCACGCTACGCTCTGTGCCCCGCGCTCTGGTTGCCC   | 300 |
| D              | CCAACATCCTGCTGTCCGGGCGCTCACGCTACGCTCTGTGCCCCGCGCTCTGGTTGCCC   | 300 |
|                | *****                                                         |     |
| XM_018051062.1 | GTGAAGGCGGCGTCTTCGIGGCGCTCTCCGCGTCCGTGCTGAGCCTTTTGGCCATTGCAC  | 360 |
| H              | GTGAAGGCGGCGTCTTCGIGGCGCTCTCCGCGTCCGTGCTGAGCCTTTTGGCCATTGCAC  | 360 |
| D              | GTGAAGGCGGCGTCTTCGIGGCGCTCTCCGCGTCCGTGCTGAGCCTTTTGGCCATTGCAC  | 360 |
|                | *****                                                         |     |
| XM_018051062.1 | TCGAGCGCCTCCTCACCATGGAGCG                                     | 385 |
| H              | TCGAGCGCCTCCTCACCATGGAGCG                                     | 385 |
| D              | TCGAGCGCCTCCTCACCATGGAGCG                                     | 385 |
|                | *****                                                         |     |

**Figure S9.** *S1PR5* gene (385-bp) demonstrative DNA sequence alignment between healthy and diarrheal Baladi kids, together with the reference sequence found in GenBank gb|XM\_018051062.1|.

|                |                                                               |     |
|----------------|---------------------------------------------------------------|-----|
| XM_005682354.3 | GCCAGTCTTAGCCAAGCGCCTCCGCGCCAGCTAGTCCGCCCCGCTCCGCCTGCGATGGC   | 60  |
| H              | GCCAGTCTTAGCCAAGCGCCTCCGCGCCAGCTAGTCCGCCCCGCTCCGCCTCCGATGGC   | 60  |
| D              | GCCAGTCTTAGCCAAGCGCCTCCGCGCCAGCTAGTCCGCCCCGCTCCGCCTGCGATGGC   | 60  |
|                | *****                                                         |     |
| XM_005682354.3 | TCCCGGCGCCGCCCTGCCGCGCTGCTTGCCTCCTGGTCCTGCTCGGGACTCTGCTGCC    | 120 |
| H              | TCCCGGCGCCGCCCTGCCGCGCTGCTTGCCTCCTGGTCCTGCTCGGGACTCTGCTCCC    | 120 |
| D              | TCCCGGCGCCGCCCTGCCGCGCTGCTTGCCTCCTGGTCCTGCTCGGGACTCTGCTGCC    | 120 |
|                | *****                                                         |     |
| XM_005682354.3 | AGGGTCTGGAGGTGCCGAAATATCAATAGATCCTTCAAAAGCCATCATACCCCGTGGAGG  | 180 |
| H              | AGGGTCTGGAGGTGCCGAAATATCAATAGATCCTTCAAAAGCCATCATACCCCGTGGAGG  | 180 |
| D              | AGGGTCTGGAGGTGCCGAAATATCAATAGATCCTTCAAAAGCCATCATACCCCGTGGAGG  | 180 |
|                | *****                                                         |     |
| XM_005682354.3 | CTCCCTGAGAGTGAACTGCAGTATCTCCTGTGACCGAAAGACAACGTTTGGCCTAGAGAC  | 240 |
| H              | CTCCCTGAGAGTGAACTGCAGTATCTCCTGTGACCGAAAGACAACATTTGGCCTAGAGAC  | 240 |
| D              | CTCCCTGAGAGTGAACTGCAGTATCTCCTGTGACCGAAAGACAACGTTTGGCCTAGAGAC  | 240 |
|                | *****                                                         |     |
| XM_005682354.3 | TGTATTAAACAAGGAGGAAGTGAGCCGTGGGCCCAACTGGAAGGTTTTTGAAGTGAAGTGA | 300 |
| H              | TGTATTAAACAAGGAGGAAGTGAGCCGTGGGCCCAACTGGAAGGTTTTTGAAGTGAAGTGA | 300 |
| D              | TGTATTAAACAAGGAGGAAGTGAGCCGTGGGCCCAACTGGAAGGTTTTTGAAGTGAAGTGA | 300 |
|                | *****                                                         |     |
| XM_005682354.3 | TGTGCAAGAAGAAATCAACCCGTTGTGCTACTCAAAGTGTACGCGGGAACAGATTGTAGC  | 360 |
| H              | TGTGCAAGAAGAAATCAACCCGTTGTGCTACTCAAAGTGTACGCGGGAACAGATTGTAGC  | 360 |
| D              | TGTGCAAGAAGAAATCAACCCGTTGTGCTACTCAAAGTGTACGCGGGAACAGATTGTAGC  | 360 |
|                | *****                                                         |     |
| XM_005682354.3 | TTCGATGAACCTCACCATATACTGGTTCCCGGAGCGCGTGGAGCTGGCTCCCCTGCCCT   | 420 |
| H              | TTCGATGAACCTCACCATATACTGGTTCCCGGAGCGCGTGGAGCTGGCTCCCCTGCCCT   | 420 |
| D              | TTCGATGAACCTCACCATATACTGGTTCCCGGAGCGCGTGGAGCTGGCTCCCCTGCCCT   | 420 |
|                | *****                                                         |     |
| XM_005682354.3 | CTGGCAGCCTGTGGGTGAAGAACTCAACCTGAGCTGCCAGGTGTCCGGT             | 469 |
| H              | CTGGCAGCCTGTGGGTGAAGAACTCAACCTGAGCTGCCAGGTGTCCGGT             | 469 |
| D              | CTGGCAGCCTGTGGGTGAAGAACTCAACCTGAGCTGCCAGGTGTCCGGT             | 469 |
|                | *****                                                         |     |

**Figure S10.** *ICAM1* gene (469-bp) demonstrative DNA sequence alignment between healthy and diarrheal Baladi kids, together with the reference sequence found in GenBank gb|XM\_005682354.3|.

|                |                                                              |     |
|----------------|--------------------------------------------------------------|-----|
| XM_005696851.3 | TCCAAGGAGCTCCAGAAGCAGTCCTGGGCACCGAGCTCAGCGCGGGAGCAGAGAGTGGCG | 60  |
| H              | TCCAAGGAGCTCCAGAAGCAGTCCTGGGCACCGAGCTCAGCGCGGGAGCAGAGAGTGGCG | 60  |
| D              | TCCAAGGAGCTCCAGAAGCAGTCCTGGGCACCGAGCTCAGCGCGGGAGCAGAGAGTGGCG | 60  |
|                | *****                                                        |     |
| XM_005696851.3 | GGGAGAGGCCGGCTCCCACCACGCCCTGGAGACCCCGCAGGTCCAAGCGCTGCTCCTGCT | 120 |
| H              | GGGAGAGGCCGGCTCCCACCACGCCCTGGAGACCCCGCAGGTCCAAGCGCTGCTCCTGCT | 120 |
| D              | GGGAGAGGCCGGTCCCACCACGCCCTGGAGACCCCGCAGGTCCAAGCGCTGCTCCTGCT  | 120 |
|                | *****                                                        |     |
| XM_005696851.3 | CGTCCCTGATGGATAAAGAGTGTGTCTACTTCTGCCACCTGGACATCATCTGGGTCAACA | 180 |
| H              | CGTCCCTGATGGATAAAGAGTGTGTCTACTTCTGCCACCTGGACATCATCTGGGTCAACA | 180 |
| D              | CGTCCCTGATGGATAAAGAGTGTGTCTACTTCTGCCACCTGGACATCATCTGGGTCAACA | 180 |
|                | *****                                                        |     |
| XM_005696851.3 | CTCCAGAGCACATTGTTCCATATGGACTCGGAAGCCCTTCTAGGTCCAAGCGCTCCTTAA | 240 |
| H              | CTCCAGAGCACATTGTTCCATATGGACTCGGAAGCCCTTCTAGGTCCAAGCGCTCCTTAA | 240 |
| D              | CTCCAGAGCACATTGTTCCATATGGACTCGGAAGCCCTTCTAGGTCCAAGCGCTCCTTAA | 240 |
|                | *****                                                        |     |
| XM_005696851.3 | AGGACTTCTTTCTACAAAGGCGACAGTCCACAGGAAGAGATGCCAGTGTACTAGCCAGA  | 300 |
| H              | AGGACTTCTTTCTACAAAGGCGACAGTCCACAGGAAGAGATGCCAGTGTACTAGCCAGA  | 300 |
| D              | AGGACTTCTTTCTACAAAGGCGACAGTCCACAGGAAGAGATGCCAGTGTACTAGCCAGA  | 300 |
|                | *****                                                        |     |
| XM_005696851.3 | CAGACAAGAAATGCCAGAACTTTTGCCAAGCAGGAAAAGAGCTCAAGGACCAAGACTCCA | 360 |
| H              | CAGACAAGAAATGCCAGAACTTTTGCCAAGCAGGAAAAGAGCTCAAGGACCAAGACTCCA | 360 |
| D              | CAGACAAGAAATGCCAGAACTTTTGCCAAGCAGGAAAAGAGCTCAAGGACCAAGACTCCA | 360 |
|                | *****                                                        |     |
| XM_005696851.3 | TGGAG                                                        | 365 |
| H              | TGGAG                                                        | 365 |
| D              | TGGAG                                                        | 365 |
|                | *****                                                        |     |

**Figure S11.** *EDN1* gene (365-bp) demonstrative DNA sequence alignment between healthy and diarrheal Baladi kids, together with the reference sequence found in GenBank gb|XM\_005696851.3|.

|                |                                                              |     |
|----------------|--------------------------------------------------------------|-----|
| XM_018048955.1 | GCGCGCCGGCTTCTACCGTCTGGAGCTGAACAAGACGCTGTGGGAGGTGCCGCAGCGGCT | 60  |
| H              | GCGCGCCGGCTTCTACCGTCTGGAGCTGAACAAGACGCTGTGGGAGGTGCCGCAGCGGCT | 60  |
| D              | GCGCGCCGGCTTCTACCGTCTGGAGCTGAACAAGACGCTGTGGGAGGTGCCGCAGCGGCT | 60  |
|                | *****                                                        |     |
| XM_018048955.1 | GCAGGGGCTGCGCCCGGTGGGCTCGGGCGCCTACGGCTCAGTCTGCTCGGCCTACGACAC | 120 |
| H              | GCAGGGGCTGCGCCCGGTGGGCTCGGGCGCCTACGGCTCAGTCTGCTCGGCCTACGACAC | 120 |
| D              | GCAGGGGCTGCGCCCGGTGGGCTCGGGCGCCTACGGCTCAGTCTGCTCGGCCTACGACAC | 120 |
|                | *****                                                        |     |
| XM_018048955.1 | ACGGCTGCGCCAGAGGGTGGCGGTGAAGAAGCTGTGCGGGCCCTTCCAGTCTCTGATCCA | 180 |
| H              | ACGGCTGCGCCAGAGGGTGGCGGTGAAGAAGCTGTGCGGGCCCTTCCAGTCTCTGATCCA | 180 |
| D              | ACGGCTGCGCCAGAGGGTGGCGGTGAAGAAGCTGTGCGGGCCCTTCCAGTCTCTGATCCA | 180 |
|                | *****                                                        |     |
| XM_018048955.1 | CGCGCGGAGGACCTACCGGGAGCTGCGGCTGCTCAAACACCTGAAGCACGAGAACGTCAT | 240 |
| H              | CGCGCGGAGGACCTACCGGGAGCTGCGGCTGCTCAAACACCTGAAGCACGAGAACGTCAT | 240 |
| D              | CGCGCGGAGGACCTACCGGGAGCTGCGGCTGCTCAAACACCTGAAGCACGAGAACGTCAT | 240 |
|                | *****                                                        |     |
| XM_018048955.1 | CGGGCTGCTGGACGTGTTACGCCTGCCACCTCCCTCGAGGATTTACGCGAAGTGTACCT  | 300 |
| H              | CGGGCTGCTGGACGTGTTACGCCTGCCACCTCCCTCGAGGATTTACGCGAAGTGTACCT  | 300 |
| D              | CGGGCTGCTGGACGTGTTACGCCTGCCACCTCCCTCGAGGATTTACGCGAAGTGTACCT  | 300 |
|                | *****                                                        |     |
| XM_018048955.1 | GGTGACCACGCTGATGGGCGCCGACCTGAACAACATCGTCAAGTGCCAGGCGCTGAGTGA | 360 |
| H              | GGTGACCACGCTGATGGGCGCCGACCTGAACAACATCGTCAAGTGCCAGGCGCTGAGTGA | 360 |
| D              | GGTGACCACGCTGATGGGCGCCGACCTGAACAACATCGTCAAGTGCCAGGCGCTGAGTGA | 360 |
|                | *****                                                        |     |
| XM_018048955.1 | CGAGCACGTGCAGTTCCTCGTGTACCAGCTGCTGCGCG                       | 398 |
| H              | CGAGCACGTGCAGTTCCTCGTGTACCAGCTGCTGCGCG                       | 398 |
| D              | CGAGCACGTGCAGTTCCTCGTGTACCAGCTGCTGCGCG                       | 398 |
|                | *****                                                        |     |

**Figure S12.** *MAPK11* gene (398-bp) demonstrative DNA sequence alignment between healthy and diarrheal Baladi kids, together with the reference sequence found in GenBank gb|XM\_018048955.1|.

|                |                                                              |     |
|----------------|--------------------------------------------------------------|-----|
| XM_018050168.1 | CGTCAGAGCCAGTGTCTGAGAATCTGGTTCTCTGCCACCCGCGAGCCCTGCATCAGCCT  | 60  |
| H              | CGTCAGAGCCAGTGTCTGAGAATCTGGTTCTCTGCCACCCGCGAGCCCTGCATCAGCCT  | 60  |
| D              | CGTCAGAGCCAGTGTCTGAGAATCTGGTTCTCTGCCACCCGCGAGCCCTGCATCAGCCT  | 60  |
|                | *****                                                        |     |
| XM_018050168.1 | GCCACTTTCCTGCTGAGGCCATGGGCCCACGGACCCTGCTGATCCTGCTGGTGGCCACAG | 120 |
| H              | GCTACTTTCCTGCTGAGGCCATGGGCCCACGGACCCTGCTGATCCTGCTGGTGGCCACAG | 120 |
| D              | GCCACTTTCCTGCTGAGGCCATGGGCCCACGGACCCTGCTGATCCTGCTGGTGGCCACAG | 120 |
|                | ** *****                                                     |     |
| XM_018050168.1 | CTTGGCATGGTCAGGGGGTCCCGGTGATAGAGCCCAGTGGCCCTGAGCTGGTGGTGGAGC | 180 |
| H              | CTTGGCATGGTCAGGGGGTCCCGGTGATAGAGCCCAGTGGCCCTGAGCTGGTGGTGGAGC | 180 |
| D              | CTTGGCATGGTCAGGGGGTCCCGGTGATAGAGCCCAGTGGCCCTGAGCTGGTGGTGGAGC | 180 |
|                | *****                                                        |     |
| XM_018050168.1 | CAGGCACAGCGGTGACCTTGGCATGTATGAGCAATGGCAGCGTGAAGTGGGATGGCCCCA | 240 |
| H              | CAGGCACAGCGGTGACCTTGGCATGTATGAGCAATGGCAGCGTGAAGTGGGATGGCCCCA | 240 |
| D              | CAGGCACAGCGGTGACCTTGGCATGTATGAGCAATGGCAGCGTGAAGTGGGATGGCCCCA | 240 |
|                | *****                                                        |     |
| XM_018050168.1 | TTTCCCCCTACTGGACTCTGGACTCTGAGGCCCCCAGAAGCATCCTCAGCACGAACAATG | 300 |
| H              | TTTCCCCCTACTGGACTCTGGACTCTGAGGCCCCCAGAAGCATCCTCAGCACGAACAATG | 300 |
| D              | TTTCCCCCTACTGGACTCTGGACTCTGAGGCCCCCAGAAGCATCCTCAGCACGAACAATG | 300 |
|                | *****                                                        |     |
| XM_018050168.1 | CCACCTTCCTGCACACGGGAACGTACCGCTGCACTGAGCCTGGAG                | 345 |
| H              | CCACCTTCCTGCACACGGGAACGTACCGCTGCACTGAGCCTGGAG                | 345 |
| D              | CCACCTTCCTGCACACGGGAACGTACCGCTGCACTGAGCCTGGAG                | 345 |
|                | *****                                                        |     |

**Figure S13.** *CSFIR* gene (345-bp) demonstrative DNA sequence alignment between healthy and diarrheal Baladi kids, together with the reference sequence found in GenBank gb|XM\_018050168.1|.

|                |                                                               |     |
|----------------|---------------------------------------------------------------|-----|
| XM_013972914.2 | GACTGTTGAGTCGTCCTCTCAAAGGAGAAGACAGTTTTCTGCTCAGCCATGACGGCGGGT  | 60  |
| H              | GACTGTTGAGTCGTCCTCTCAAAGGAGAAGACAGTTTTCTGCTCAGCCATGACGGCGGGT  | 60  |
| D              | GACTGTTGAGTCGTCCTCTCAAAGGAGAAGACAGTTTTCTGCTCAGCCATGATGGCGGGT  | 60  |
|                | *****                                                         |     |
| XM_013972914.2 | CTGTGATATGTTCCACCCTGGACTGTAAGCCATGACCTAGTCCACCCTCGGGCAGCAGCA  | 120 |
| H              | CTGTGATATGTTCCACCCTGGACTGTAAGCCATGACCTAGTCCACCCTCGGGCAGCAGCA  | 120 |
| D              | CTGTGATATGTTCCACCCTGGACTCTAAGCCATGACCTAGTCCACCCTCGGGCAGCAGCA  | 120 |
|                | *****                                                         |     |
| XM_013972914.2 | GCGGCAGGTGTGACCACGACGGAACCTGACTTGGGAGAGCAGCTACCCCGAGGGTTGATGG | 180 |
| H              | GCGGCAGGTGTGACCACGACGGAACCTGACTTGGGAGAGCAGCTACCCCGAGGGCTGATGG | 180 |
| D              | GCGGCAGGTGTGACCACGACGGAACCTGACTTGGGAGAGCAGCTACCCCGAGGGTTGATGG | 180 |
|                | *****                                                         |     |
| XM_013972914.2 | CTGGAATGTCTCGGCTACCGCCAGCATGTACTGGTGTGTGGGGCCAGCAGGGTCAGCTG   | 240 |
| H              | CTGGAATGTCTCGGCTACCGCCAGCATGTACTGGTGTGTGGGGCCAGCAGGGTCAGCTG   | 240 |
| D              | CTGGAATGTCTCGGCTACCGCCAGCATGTACTGGTGTGTGGGGCCAGCAGGGTCAGCTG   | 240 |
|                | *****                                                         |     |
| XM_013972914.2 | TGTGTCCAGGACGCGCCATGGAGACCCAGGAGAACGGTGCTGGGGACATGGGCAGCAAAAC | 300 |
| H              | TGTGTCCAGGACGCGCCATGGAGACCCAGGAGAACGGTGCTGGGGACATGGGCAGCAAAAC | 300 |
| D              | TGTGTCCAGGACGCGCCATGGAGACCCAGGAGAACGGTGCTGGGGACATGGGCAGCAAAAC | 300 |
|                | *****                                                         |     |
| XM_013972914.2 | TCTCCATGCCAGGTGGTGAGCCCATAGTGCAGAGCCTCAGGACGGAAGGCATTTCATGCTG | 360 |
| H              | TCTCCATGCCAGGTGGTGAGCCCATAGTGCAGAGCCTCAGGACGGAAGGCATTTCATGCTG | 360 |
| D              | TCTCCATGCCAGGTGGTGAGCCCATAGTGCAGAGCCTCAGGACGGAAGGCATTTCATGCTG | 360 |
|                | *****                                                         |     |
| XM_013972914.2 | CATACAGGCGAGGAGACGTCAGCAGAGCCAGCATCTGCTCCGAGAAGCTTGTGACGAGA   | 420 |
| H              | CATACAGGCGAGGAGACGTCAGCAGAGCCAGCATCTGCTCCGAGAAGCTTGTGACGAGA   | 420 |
| D              | CATACAGGCAAGGAGACGTCAGCAGAGCCAGCATCTGCTCCGAGAAGCTTGTGACGAGA   | 420 |
|                | *****                                                         |     |
| XM_013972914.2 | GCACATCCCAGCTGGAAAAGAGCCAGCTCCTGAGTATCTCTGCAGCCCATGGTGACCTGG  | 480 |
| H              | GCACATCCCAGCTGGAAAAGAGCCAGCTCCTGAGTATCTCTGCAGCCCATGGTGACCTGG  | 480 |
| D              | GCACATCCCAGCTGGAAAAGAGCCAGCTCCTGAGTATCTCTGCAGCCCATGGTGACCTGG  | 480 |
|                | *****                                                         |     |
| XM_013972914.2 | AGACCGTCCGGTATCTTCTCACTGAGAGGCTGGTGGAGCTACGGACGGAG            | 530 |
| H              | AGACCGTCCGGTATCTTCTCACTGAGAGGCTGGTGGAGCTACGGACGGAG            | 530 |
| D              | AGACCGTCCGGTATCTTCTCACTGAGAGGCTGGTGGAGCTACGGACGGAG            | 530 |
|                | *****                                                         |     |

**Figure S14.** *LRRK1* gene (530-bp) demonstrative DNA sequence alignment between healthy and diarrheal Baladi kids, together with the reference sequence found in GenBank gb|XM\_013972914.2|.

|                |                                                              |     |
|----------------|--------------------------------------------------------------|-----|
| XM_018060122.1 | TAGCAGAGGAGAACCTGACACAGTGGTGAGCACTGTCAATGCTAGATGTGCCCTGAAGGG | 60  |
| H              | TAGCAGAGGAGAACCTGACACAGTGGTGAGCACTGTCAATGCTAGATGTGCCCTGAAGGG | 60  |
| D              | TAGCAGAGGAGAACCTGACACAGTGGTGAGCACTGTCAATGCTAGATGTGCCCTGAAGGG | 60  |
|                | *****                                                        |     |
| XM_018060122.1 | TCTCCAAATGAGATTTCCAGCAAAAATCGTGTGGCTTCTGCTGTGGACCGTTTGTGTCTG | 120 |
| H              | TCTCCAAATGAGATTTCCAGCAAAAATCGTGTGGCTTCTGCTGTGGACCGTTTGTGTCTG | 120 |
| D              | TCTCCAAATGAGATTTCCAGCAAAAATCGTGTGGCTTCTGCTGTGGACCGTTTGTGTCTG | 120 |
|                | *****                                                        |     |
| XM_018060122.1 | CAGAAGACTGTAAAGAACCCCTCCAGAAAAGAAACAGAAATCCTGTCAGGTTCTTGGA   | 180 |
| H              | CAGAAGACTGTAAAGAACCCCTCCAGAAAAGAAACAGAAATCCTGTCAGGTTCTTGGA   | 180 |
| D              | CAGAAGACTGTAAAGAACCCCTCCAGAAAAGAAACAGAAATCCTGTCAGGTTCTTGGA   | 180 |
|                | *****                                                        |     |
| XM_018060122.1 | CTGAACAAACATATCGAGAGGGCACTCAGGCTACATATAAATGCAGCCCTGGATACAGAA | 240 |
| H              | CTGAACAAACATATCGAGAGGGCACTCAGGCTACATATAAATGCAGCCCTGGATACAGAA | 240 |
| D              | CTGAACAAACATATCGAGAGGGCACTCAGGCTACATATAAATGCAGCCCTGGATACAGAA | 240 |
|                | *****                                                        |     |
| XM_018060122.1 | CTCTGGGGAGTATTGTAATGGTGTGCAAGGGTGGAAAATGGGTGTCTCTTTATCCATCGA | 300 |
| H              | CTCTGGGGAGTATTGTAATGGTGTGCAAGGGTGGAAAATGGGTGTCTCTTTATCCATCGA | 300 |
| D              | CTCTGGGGAGTATTGTAATGGTGTGCAAGGGTGGAAAATGGGTGTCTCTTTATCCATCGA | 300 |
|                | *****                                                        |     |
| XM_018060122.1 | GGATATGTCGGAAGGACCCCTGTGCACACCCTGGAGACACTCCATTGGTTCTTTCCATC  | 360 |
| H              | GGATATGTCGGAAGGACCCCTGTGCACACCCTGGAGACACTCCATTGGTTCTTTCCATC  | 360 |
| D              | GGATATGTCGGAAGGACCCCTGTGCACACCCTGGAGACACTCCATTGGTTCTTTCCATC  | 360 |
|                | *****                                                        |     |
| XM_018060122.1 | TTGCAGAAGGAACTCAGTTTGAATATGGTGCAAAAGTTGTTTATACGTGTGATGAGGGGT | 420 |
| H              | TTGCAGAAGGAACTCAGTTTGAATATGGTGCAAAAGTTGTTTATACGTGTGATGAGGGGT | 420 |
| D              | TTGCAGAAGGAACTCAGTTTGAATATGGTGCAAAAGTTGTTTATACGTGTGATGAGGGGT | 420 |
|                | *****                                                        |     |
| XM_018060122.1 | ATCAGATGCTGGGTGAGATGAATTTCCGTGAATGTGACACAAATGGATGGACCAATGATA | 480 |
| H              | ATCAGATGCTGGGTGAGATGAATTTCCGTGAATGTGACACAAATGGATGGACCAATGATA | 480 |
| D              | ATCAGATGCTGGGTGAGATGAATTTCCGTGAATGTGACACAAATGGATGGACCAATGATA | 480 |
|                | *****                                                        |     |
| XM_018060122.1 | TTCCCATATGTGAAGTTGTTAAGTGT                                   | 506 |
| H              | TTCCCATATGTGAAGTTGTTAAGTGT                                   | 506 |
| D              | TTCCCATATGTGAAGTTGTTAAGTGT                                   | 506 |
|                | *****                                                        |     |

**Figure S15.** *CFH* gene (506-bp) demonstrative DNA sequence alignment between healthy and diarrheal Baladi kids, together with the reference sequence found in GenBank gb|XM\_018060122.1|.
